# Supplementary material for: Biomarkers of Metabolic Adaptation to High Dietary Fats in a Mouse Model of Obesity Resistance
Source: MDPI journal article supplement (doi:10.3390/metabo14010069), 2024-01-20
Supplement: s1 [file s1]

## Article

# Biomarkers of Metabolic Adaptation to High Dietary Fats in a Mouse Model of Obesity Resistance

Fadia Milhem <sup>1,2,3</sup>, Leah M. Hamilton <sup>2,4</sup>, Emily Skates <sup>1</sup>, Mickey Wilson <sup>1</sup>, Suzanne D. Johanningsmeier <sup>5</sup> and Slavko Komarnytsky <sup>1,2,\*</sup>

<sup>1</sup> Plants for Human Health Institute, North Carolina State University, 600 Laureate Way, Kannapolis, NC 28081, USA; fjmilhem@ncsu.edu (F.M.); eskates@ncsu.edu (E.S.); mlwilso8@ncsu.edu (M.W.)

<sup>2</sup> Department of Food, Bioprocessing and Nutrition Sciences, North Carolina State University, 400 Dan Allen Drive, Raleigh, NC 27695, USA; lhamilton@vsn.edu

<sup>3</sup> Department of Nutrition, University of Petra, 317 Airport Road, Amman 11196, Jordan

<sup>4</sup> College of Agriculture, Virginia State University, 1 Hayden Drive, Petersburg, VA 23806, USA

<sup>5</sup> United States Department of Agriculture-Agricultural Research Service, Southeast Area, Food Science and Market Quality & Handling Research Unit, North Carolina State University, 322 Schaub Hall, Box 7624, Raleigh, NC 27695, USA; suzanne.johanningsmeier@usda.gov

\* Correspondence: komarnytsky@ncsu.edu; Tel.: +1-(704)-250-5459

## Supplementary Data

**Supplementary Table S1.** Fold-changes in skeletal muscle function gene expression (NRs versus HFD controls).

| Fold | Gene          | Gene description                                                    |
|------|---------------|---------------------------------------------------------------------|
| 17.0 | <i>Mmp9</i>   | Matrix metalloproteinase 9                                          |
| 3.7  | <i>Tnni2</i>  | Troponin I, skeletal, fast 2                                        |
| 2.9  | <i>Cs</i>     | Citrate synthase                                                    |
| 2.6  | <i>Foxo3</i>  | Forkhead box O3                                                     |
| 2.5  | <i>Casp3</i>  | Caspase 3                                                           |
| 2.4  | <i>Dmd</i>    | Dystrophin, muscular dystrophy                                      |
| 2.3  | <i>Mef2c</i>  | Myocyte enhancer factor 2C                                          |
| 2.3  | <i>Pdk4</i>   | Pyruvate dehydrogenase kinase, isoenzyme 4                          |
| 2.3  | <i>Ikbkb</i>  | Inhibitor of kappaB kinase beta                                     |
| 2.3  | <i>Il1b</i>   | Interleukin 1 beta                                                  |
| 2.2  | <i>Tgfb1</i>  | Transforming growth factor, beta 1                                  |
| 2.2  | <i>Ppp3ca</i> | Protein phosphatase 3, catalytic subunit, alpha isoform             |
| 2.1  | <i>Musk</i>   | Muscle, skeletal, receptor tyrosine kinase                          |
| 2.1  | <i>Actn3</i>  | Actinin alpha 3                                                     |
| 2.1  | <i>Lmna</i>   | Lamin A                                                             |
| 2.0  | <i>Capn2</i>  | Calpain 2                                                           |
| 2.0  | <i>Myh2</i>   | Myosin, heavy polypeptide 2, skeletal muscle, adult                 |
| 2.0  | <i>Myh1</i>   | Myosin, heavy polypeptide 1, skeletal muscle, adult                 |
| -2.1 | <i>Slc2a4</i> | Solute carrier family 2 (facilitated glucose transporter), member 4 |
| -3.4 | <i>Tnnc1</i>  | Troponin C, cardiac/slow skeletal                                   |

**Supplementary Table S2.** Fold-changes in mitochondrial function gene expression (HFD versus LFD controls).

| <b>Fold</b> | <b>Gene</b> | <b>Gene description</b>                                               |
|-------------|-------------|-----------------------------------------------------------------------|
| 1.92        | Cpt1b       | Carnitine palmitoyltransferase 1b, muscle                             |
| 1.85        | Bnip3       | BCL2/adenovirus E1B interacting protein 3                             |
| 1.84        | Slc25a3     | Solute carrier family 25 (phosphate carrier), member 3                |
| -1.69       | Slc25a21    | Solute carrier family 25 (oxodicarboxylate carrier), member 21        |
| -1.73       | Imp2l1      | IMP2 inner mitochondrial membrane peptidase-like (S. cerevisiae)      |
| -1.80       | Timm22      | Translocase of inner mitochondrial membrane 22 homolog (yeast)        |
| -1.83       | Mst1        | Misato homolog 1 (Drosophila)                                         |
| -1.84       | Slc25a27    | Solute carrier family 25, member 27                                   |
| -1.84       | Slc25a24    | Solute carrier family 25 (phosphate carrier), member 24               |
| -1.88       | Slc25a13    | Solute carrier family 25 (adenine nucleotide translocator), member 13 |
| -1.94       | Nefl        | Neurofilament, light polypeptide                                      |
| -1.98       | Slc25a10    | Solute carrier family 25 (dicarboxylate transporter), member 10       |
| -2.09       | Sfn         | Stratifin                                                             |
| -2.31       | Bbc3        | BCL2 binding component 3                                              |
| -2.32       | Ucp1        | Uncoupling protein 1 (mitochondrial, proton carrier)                  |
| -2.35       | Cdkn2a      | Cyclin-dependent kinase inhibitor 2A                                  |
| -2.58       | Pmaip1      | Phorbol-12-myristate-13-acetate-induced protein 1                     |
| -3.42       | Bid         | BH3 interacting domain death agonist                                  |
| -3.59       | Slc25a37    | Solute carrier family 25, member 37                                   |

**Supplementary Table S3.** Fold-changes in mitochondrial function gene expression (NRs versus HFD controls).

| Fold | Gene     | Gene description                                                             |
|------|----------|------------------------------------------------------------------------------|
| 4.9  | Slc25a37 | Solute carrier family 25, member 37                                          |
| 2.4  | Ucp2     | Uncoupling protein 2 (mitochondrial, proton carrier)                         |
| -1.8 | Ucp1     | Uncoupling protein 1 (mitochondrial, proton carrier)                         |
| -1.8 | Slc25a13 | Solute carrier family 25 (adenine nucleotide translocator), member 13        |
| -1.8 | Cpt1b    | Carnitine palmitoyltransferase 1b, muscle                                    |
| -1.8 | Slc25a10 | Solute carrier family 25 (dicarboxylate transporter), member 10              |
| -1.9 | Slc25a2  | Solute carrier family 25 (ornithine transporter), member 2                   |
| -1.9 | Nefl     | Neurofilament, light polypeptide                                             |
| -1.9 | Slc25a4  | Solute carrier family 25 (adenine nucleotide translocator), member 4         |
| -1.9 | Slc25a31 | Solute carrier family 25 (adenine nucleotide translocator), member 31        |
| -1.9 | Fxc1     | Fractured callus expressed transcript 1                                      |
| -2.0 | Timm9    | Translocase of inner mitochondrial membrane 9 homolog (yeast)                |
| -2.1 | Bbc3     | BCL2 binding component 3                                                     |
| -2.2 | Slc25a22 | Solute carrier family 25 (mitochondrial carrier, glutamate), member 22       |
| -2.4 | Bnip3    | BCL2/adenovirus E1B interacting protein 3                                    |
| -2.4 | Slc25a21 | Solute carrier family 25 (mitochondrial oxodicarboxylate carrier), member 21 |
| -2.6 | Msto1    | Misato homolog 1 (Drosophila)                                                |
| -2.6 | Mtx2     | Metaxin 2                                                                    |

**Supplementary Table S4.** Fold-changes in mitochondrial function gene expression (SRs versus HFD controls).

| Fold | Gene     | Gene description                                                             |
|------|----------|------------------------------------------------------------------------------|
| 2.8  | Slc25a1  | Solute carrier family 25 (citrate transporter), member 1                     |
| 1.9  | Slc25a37 | Solute carrier family 25, member 37                                          |
| -1.8 | Cpt1b    | Carnitine palmitoyltransferase 1b, muscle                                    |
| -1.8 | Pmaip1   | Phorbol-12-myristate-13-acetate-induced protein 1                            |
| -1.8 | Slc25a13 | Solute carrier family 25 (adenine nucleotide translocator), member 13        |
| -1.9 | Slc25a2  | Solute carrier family 25 (ornithine transporter), member 2                   |
| -2.0 | Slc25a31 | Solute carrier family 25 (adenine nucleotide translocator), member 31        |
| -2.0 | Bnip3    | BCL2/adenovirus E1B interacting protein 3                                    |
| -2.1 | Cdkn2a   | Cyclin-dependent kinase inhibitor 2A                                         |
| -2.1 | Nefl     | Neurofilament, light polypeptide                                             |
| -2.1 | Timm9    | Translocase of inner mitochondrial membrane 9 homolog (yeast)                |
| -2.3 | Bbc3     | BCL2 binding component 3                                                     |
| -2.4 | Slc25a21 | Solute carrier family 25 (mitochondrial oxodicarboxylate carrier), member 21 |
| -2.4 | Slc25a30 | Solute carrier family 25, member 30                                          |
| -2.7 | Tomm40l  | Translocase of outer mitochondrial membrane 40 homolog-like (yeast)          |
| -2.8 | Mtx2     | Metaxin 2                                                                    |

**Supplementary Table S5.** Fold-changes in mitochondrial function gene expression (SRs-LFD versus HFD controls).

| <b>Fold</b> | <b>Gene</b> | <b>Gene description</b>                                                      |
|-------------|-------------|------------------------------------------------------------------------------|
| 1.7         | Timm22      | Translocase of inner mitochondrial membrane 22 homolog (yeast)               |
| -2.0        | Bnip3       | BCL2/adenovirus E1B interacting protein 3                                    |
| -2.0        | Slc25a20    | Solute carrier family 25 (carnitine/acylcarnitine translocase), member 20    |
| -2.0        | Slc25a10    | Solute carrier family 25 (dicarboxylate transporter), member 10              |
| -2.0        | Slc25a13    | Solute carrier family 25 (adenine nucleotide translocator), member 13        |
| -2.1        | Fxc1        | Fractured callus expressed transcript 1                                      |
| -2.1        | Slc25a2     | Solute carrier family 25 (ornithine transporter), member 2                   |
| -2.2        | Timm9       | Translocase of inner mitochondrial membrane 9 homolog (yeast)                |
| -2.2        | Slc25a31    | Solute carrier family 25 (adenine nucleotide translocator), member 31        |
| -2.3        | Cpt1b       | Carnitine palmitoyltransferase 1b, muscle                                    |
| -2.3        | Nefl        | Neurofilament, light polypeptide                                             |
| -2.4        | Cpt2        | Carnitine palmitoyltransferase 2                                             |
| -3.0        | Bbc3        | BCL2 binding component 3                                                     |
| -3.0        | Slc25a21    | Solute carrier family 25 (mitochondrial oxodicarboxylate carrier), member 21 |
| -3.4        | Mtx2        | Metaxin 2                                                                    |
| -3.5        | Slc25a22    | Solute carrier family 25 (mitochondrial carrier, glutamate), member 22       |

**Supplementary Table S6.** Fold-changes in mitochondrial function gene expression (NR versus SR mice).

| <b>Fold</b> | <b>Gene</b> | <b>Gene description</b>                                              |
|-------------|-------------|----------------------------------------------------------------------|
| 2.6         | Slc25a37    | Solute carrier family 25, member 37                                  |
| 2.0         | Opa1        | Optic atrophy 1 homolog (human)                                      |
| 1.9         | Tomm40l     | Translocase of outer mitochondrial membrane 40 homolog-like (yeast)  |
| 1.7         | Ucp2        | Uncoupling protein 2 (mitochondrial, proton carrier)                 |
| -2.3        | Slc25a4     | Solute carrier family 25 (adenine nucleotide translocator), member 4 |
| -2.5        | Msto1       | Misato homolog 1 (Drosophila)                                        |
| -2.7        | Slc25a1     | Solute carrier family 25 (citrate transporter), member 1             |
